# Supplementary material for: Improving the network management of integrated primary mental healthcare for older people in a rural Australian region: protocol for a mixed methods case study
Source: HighWire-hosted journal article supplement (doi:10.1136/bmjopen-2014-006304), 2014-09-01
Supplement: bmjopen-2014-006304supp1.pdf [file bmjopen-2014-006304supp1.pdf]

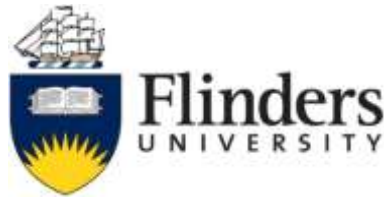

## Together for the Mental Health of Older People (T-MOP) Key informant & service network survey

We are interested in the communication links that you have with other services that enables you and your organisation to provide care and support for people aged >65 with a mental health issue.

We are interested in:

- (a) Communication about the provision of client care.
- (b) Communication about the management, planning and operation of services for mental health care in the region.

### ABOUT YOU AND YOUR ORGANISATION

1. First we want to know who you are, so that we have a record of who has participated and if we need to clarify anything with you. Your name will not be included in any report that is produced.
  - 1.1. Your name:.....
  - 1.2. Job title:.....
  - 1.3. Organisation & Department .....
  - 1.4. Location of organisation (Town): .....
  - 1.5. How many years/months have you been working at the organisation? .....
  - 1.6. Email: .....
  - 1.7. Phone number: .....
2. About the organisation that you work for. Can you tell me what is your organisation's role in the provision of services for older people?

### NETWORK SURVEY

3. Can you list on the survey sheet that I will give you up to 15 other services with whom you and others in your organisation (to the best of your knowledge) have communicated over the past 3 months. List those services that you consider are the most important for your organisation in providing care and support for older people with mental health issues. They could be important to you because you communicate with them frequently; alternatively they could be important to you as resource, even though communication is less frequent.

We are interested in:

- (a) Communication about the provision of client care. There are two parts to this:

#### **a1. Information about client care**

This includes giving or receiving information about mental health care for clients, such as case conferences, sharing client information and/or case notes, corridor conversations, meetings and or correspondence about client care. The information can be about specific clients or clients in general.

#### **a2. Referrals**

This is where you send or receive a client referral. This can occur informally (such as recommending to a client that they see a particular service) or more formally by making a phone call or sending a referral letter to a service.

- (b) Communication about the management, planning and operation of services for mental health care in the region. The communication can occur formally (e.g. in meetings) or informally (e.g. in the corridor or 1:1).

### SURVEY SHEET

| LIST THE SERVICES HERE                            |                            | Score only those activities you do with each other service<br>(on average over the past 3 months how often did you communicate with them)<br>1 = less than once per week;<br>2 = about once per week<br>3 = more than once per week |              |   |                                     |
|---------------------------------------------------|----------------------------|-------------------------------------------------------------------------------------------------------------------------------------------------------------------------------------------------------------------------------------|--------------|---|-------------------------------------|
| YOU DO NOT HAVE TO LIST 15, BUT 15 IS THE MAXIMUM |                            | (a) Client care                                                                                                                                                                                                                     |              |   | (b) Management, planning, operation |
| Name of service                                   | Location of service (town) | a1 Information                                                                                                                                                                                                                      | a2. Referral |   |                                     |
|                                                   |                            |                                                                                                                                                                                                                                     |              |   |                                     |
|                                                   |                            | Send                                                                                                                                                                                                                                | Receive      |   |                                     |
| <i>Example: Community Health Centre</i>           | <i>Smithtown</i>           | 3                                                                                                                                                                                                                                   | 1            | - | 2                                   |
| 1                                                 |                            |                                                                                                                                                                                                                                     |              |   |                                     |
| 2                                                 |                            |                                                                                                                                                                                                                                     |              |   |                                     |
| 3                                                 |                            |                                                                                                                                                                                                                                     |              |   |                                     |
| 4                                                 |                            |                                                                                                                                                                                                                                     |              |   |                                     |
| 5                                                 |                            |                                                                                                                                                                                                                                     |              |   |                                     |
| 6                                                 |                            |                                                                                                                                                                                                                                     |              |   |                                     |
| 7                                                 |                            |                                                                                                                                                                                                                                     |              |   |                                     |
| 8                                                 |                            |                                                                                                                                                                                                                                     |              |   |                                     |
| 9                                                 |                            |                                                                                                                                                                                                                                     |              |   |                                     |
| 10                                                |                            |                                                                                                                                                                                                                                     |              |   |                                     |
| 11                                                |                            |                                                                                                                                                                                                                                     |              |   |                                     |
| 12                                                |                            |                                                                                                                                                                                                                                     |              |   |                                     |
| 13                                                |                            |                                                                                                                                                                                                                                     |              |   |                                     |
| 14                                                |                            |                                                                                                                                                                                                                                     |              |   |                                     |
| 15                                                |                            |                                                                                                                                                                                                                                     |              |   |                                     |

## **EXPERIENCE OF WORKING TOGETHER**

4. I now want to ask you if there are any formal or informal processes that support your communication links with these other services.

*(for prompt of links show the list of link strategies discussed at the workshop)*

5. Are there examples where you consider that services in the region work together well to provide services to older people with mental health issues?

*Please describe these examples – and why you think these work well*

6. Are there examples where you consider that services in the region DO NOT work together well to provide services to older people with mental health issues?

*Please describe these examples – and why you think these DO NOT work well*

7. Are there things that you would like to see changed in the way that services work together to meet the mental the needs of older people with mental health issues?

8. Is there anything else that you would like to say about how services in the region work together to provide services to older people with mental health issues?

THANK YOU
