# Supplementary material for: Improving the network management of integrated primary mental healthcare for older people in a rural Australian region: protocol for a mixed methods case study
Source: HighWire-hosted journal article supplement (doi:10.1136/bmjopen-2014-006304), 2014-09-01
Supplement: bmjopen-2014-006304supp2.pdf [file bmjopen-2014-006304supp2.pdf]

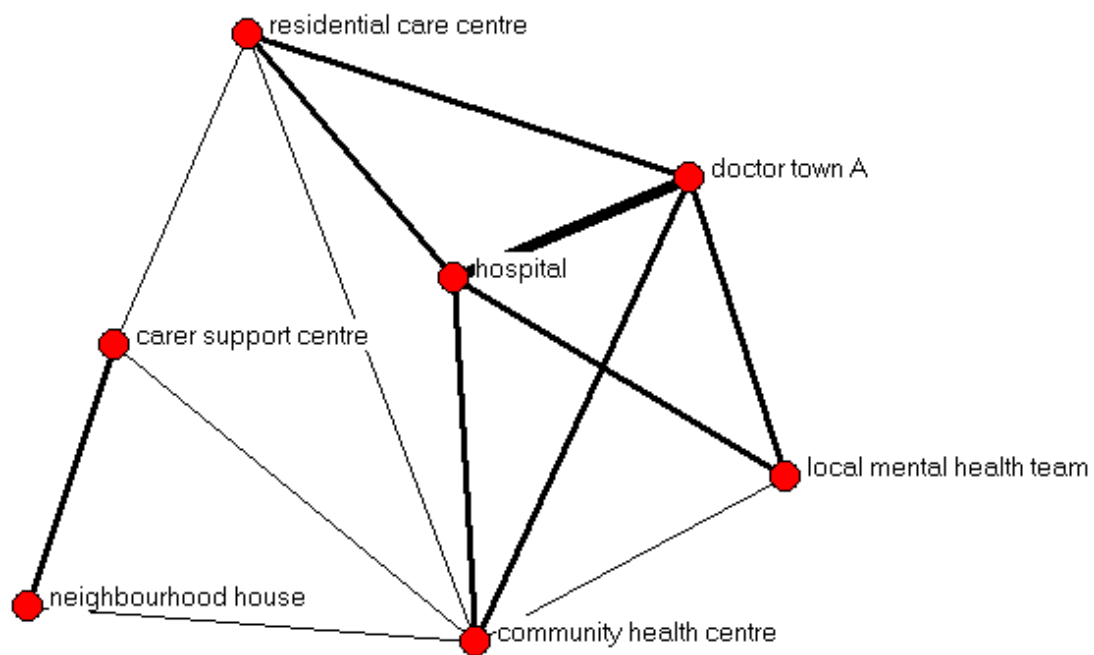

**Example of a network map**

- \* lines show which organisations are linked in some way
- \* thickness of line indicates the frequency the link is used
- \* most frequent links occur between the doctor and hospital
- \* some organisations are not directly linked, eg neighbourhood house has no direct links with the hospital
